# Supplementary material
Source: HighWire-hosted journal article supplement (http://ajnr-stage2.highwire.org/highwire/filestream/90151/field_highwire_adjunct_files/0/0999.pdf)
Supplement: 0999.pdf [file 0999.pdf]

| Table 2 : Characteristics of ASL |                       |                             |                      |                             |                              |                              |                              |                     |                                              |
|----------------------------------|-----------------------|-----------------------------|----------------------|-----------------------------|------------------------------|------------------------------|------------------------------|---------------------|----------------------------------------------|
| Author                           | Measurement methods   | Patient's with clinical SOZ | Seizure phase        | Accuracy of ASL SOZ: (hypo) | Accuracy of ASL SOZ: (hyper) | Accuracy of ASL SOZ: (sMRI-) | Accuracy of ASL SOZ: (sMRI+) | Concordance to VEEG | Concordant/Partially concordant <sup>c</sup> |
| Sierra-Marcos                    | Qualitative analysis  | 21                          | No mention           | 9/9                         | 6/6                          | 1(4)                         | 14(17)                       | 15/25               | 15/0                                         |
| Beom Su Kim                      | Qualitative analysis  | 42                          | No mention           | 1/1                         | 30/34                        | — <sup>b</sup>               | —                            | 32/44               | 10/21                                        |
| Boscolo Galazzo                  | Quantitative analysis | 20                          | Inter-p <sup>a</sup> | 18/18                       | 0/0                          | 18(20)                       | 0(0)                         | 18/20               | 14/4                                         |
| Gaxiola-Valdez                   | Quantitative analysis | 18                          | Post-p               | 12/15                       | 0/2                          | 5(9)                         | 7(9)                         | 12/19               | 10/2                                         |
| Shang, K.                        | Quantitative analysis | 20                          | Inter-p              | 14/14                       | 0/0                          | 14(20)                       | 0(0)                         | —                   | 11/3                                         |
| Lee, S. M.                       | Qualitative analysis  | 34                          | not mention          | 16/22                       | 3/3                          | 19(34)                       | 0(0)                         | 21/43               | 12/7                                         |
| Total amount                     | —                     | 155                         | —                    | 70/79                       | 39/45                        | 57(87)                       | 21(26)                       | 98/151              | 72/37                                        |
| Percentage (%)                   | —                     | —                           | —                    | 88.6                        | 86.7                         | 65.5                         | 80.8                         | 64.9                | —                                            |

table2 : "hypo" means hypoperfusion with accuracy; "all hypo" means all hypoperfusion; "hyper" means hyperperfusion with accuracy; "all hyper" means all hyperperfusion; sMRI+: positive result in structural MRI; sMRI-: negative result in structural MRI; a: p means period; b: — means not found in research; c: Concordant means epileptogenic zone based on ASL was the same as the epileptogenic zone based on clinical seizure focus. Partial concordance means larger or smaller.

| table 1 : Characteristics of included researches |             |                     |               |                        |      |    |    |    |    |             |             |
|--------------------------------------------------|-------------|---------------------|---------------|------------------------|------|----|----|----|----|-------------|-------------|
| Author                                           | country     | patients<br>( man ) | ages ( y )    | study design           | year | tp | fp | fn | tn | sensitively | specificity |
| Sierra-Marcos                                    | Spain       | 26 ( 8 )            | 32.4±13.8     | Retrospective analysis | 2016 | 15 | 0  | 6  | 4  | 0.74        | 1           |
| Beom Su Kim                                      | Korea       | 44 ( 21 )           | 51(average)   | Retrospective analysis | 2016 | 31 | 6  | 7  | 0  | 0.82        | 0           |
| Boscolo Galazzo                                  | UK          | 20 ( 10 )           | 34±12         | Retrospective analysis | 2016 | 13 | 5  | 2  | 0  | 0.87        | 0           |
| Gaxiola-Valdez                                   | Canada      | 21 ( 10 )           | 33.9(average) | Retrospective analysis | 2017 | 12 | 3  | 5  | 1  | 0.71        | 0.25        |
| Shang, K.                                        | America     | 20 ( 13 )           | 26.5±9.48     | Retrospective analysis | 2018 | 13 | 1  | 6  | 10 | 0.68        | 0.91        |
| Lee, S. M.                                       | South Korea | 43(17)              | 6.3±3.3       | Retrospective analysis | 2019 | 19 | 6  | 10 | 8  | 0.66        | 0.57        |
